# Supplementary material for: Environmental and Genetic Factors in the Pathogenesis of COPD in the Road-Working Population
Source: Hindawi journal article supplement (doi:10.1155/2021/9953234), 2021-04-29
Supplement: f1 [file 9953234.f1.docx]

Table S1. Sequence of primers for rt-PCR.

| Gene name | Forward | Reverse |
| --- | --- | --- |
| COL15A1 | GACACTGGTTTACCTGGCTTTC | CTGAAACGTTTAGCAAATTCCA |
| MEIS1 | AAGCAGTTGGCACAAGACACGG | CTGCTCGGTTGGACTGGTCTAT |
| CBR3 | GCTTCCACCAACTGGACATC | GGGCATTGGATCATCACTCT |
| AOC3 | TGAGAGTGGGAAAGGAGTG | TGGGCAACAGAGCAAAAC |
| β-actin | CCATCGTCCACCGCAAAT | GCTGTCACCTTCACCGTTCC |
